# Supplementary material for: A systematic review of biomarkers for disease progression in Parkinson’s disease
Source: PubMed Central journal article supplement (PMC3637496; doi:10.1186/1471-2377-13-35), 2013-04-12
Supplement: 1471-2377-13-35-S2.pdf [file 1471-2377-13-35-S2.pdf]

**General Information**

|                   |  |
|-------------------|--|
| Article Title     |  |
| Author            |  |
| Journal           |  |
| Citation          |  |
| Country           |  |
| Source of Funding |  |
| How PD Diagnosed? |  |

**Participant Numbers**

|                       | PD Group | Control Group |
|-----------------------|----------|---------------|
| Number Eligible       |          |               |
| Number Enrolled       |          |               |
| Number of Withdrawals |          |               |
| Number of Exclusions  |          |               |
| Number Lost to FU     |          |               |

**Study Characteristics**

|            |  |           |      |
|------------|--|-----------|------|
| Record No. |  | Collector | Date |
|------------|--|-----------|------|

|                                          |  |
|------------------------------------------|--|
| Aims and Objectives                      |  |
| Study Design                             |  |
| Inclusion/<br>Exclusion Criteria         |  |
| Recruitment<br>(including randomization) |  |

**Participant Baseline Characteristics**

|                                  | PD Group |
|----------------------------------|----------|
| Age                              |          |
| Sex                              | Male     |
|                                  | Female   |
| Disease Characteristics or Stage |          |
| Treated                          |          |
| Untreated                        |          |

**Intervention**

|            |  |
|------------|--|
| Record No. |  |
|------------|--|

|                                     |  |
|-------------------------------------|--|
| Description of test performed       |  |
| How often repeated and time periods |  |
| Theoretical basis                   |  |

**Outcome Data (correlation with impairment, handicap, disability, survival and statistic analysis used)**

**Outcome Data (influence of drug therapy on marker)**

- Details of any economical analysis
- Details of any assessment of test suitability and acceptability to the patient

**Quality Questionnaire**

*(Based on REMARK [Reporting recommendations for tumour MARKer prognostic studies])*

**(1) Was the study prospective?**

|     |                                                                                                                    |
|-----|--------------------------------------------------------------------------------------------------------------------|
| YES | The study reports that patients and the performed test result were collected before the development of an outcome. |
| NO  | No report or clearly retrospective (eg, patients with poor prognosis collected before biomarker measurement).      |

**(2) Was evaluation of prognostic marker blinded to patient outcome?**

|     |                                                                                                       |
|-----|-------------------------------------------------------------------------------------------------------|
| YES | The study reports an attempt to blind the person measuring the level of biomarker to patient outcome. |
| NO  | There is no such report.                                                                              |

**(3) Was there a defined time period during which patients were enrolled?**

|     |                                                                               |
|-----|-------------------------------------------------------------------------------|
| YES | Study define time period, end of follow-up period, and median follow-up time. |
| NO  | Does not define above criteria.                                               |

**(4) Were there precisely defined clinical outcomes at the start of the study?**

|     |                                                             |
|-----|-------------------------------------------------------------|
| YES | Study defines which clinical end points are to be measured. |
| NO  | No such definition.                                         |

**(5) Were the methods for measuring the prognostic marker adequately described and referenced?**

|     |  |
|-----|--|
| YES |  |
| NO  |  |

**(6) Cases unselected/unbiased?**

|     |                                                                    |
|-----|--------------------------------------------------------------------|
| YES | No attempt to select patients with exclusion criteria              |
| NO  | Only a subset of patients with Parkinson’s disease enter the study |
